# Supplementary material for: A Flexible Optoelectronic Device for Continuous Cerebral Blood Flow Monitoring
Source: MDPI journal article supplement (doi:10.3390/bios12110944), 2022-10-31
Supplement: s1 [file s1]

Supporting Information

# A Flexible Optoelectronic Device for Continuous Cerebral Blood Flow Monitoring

Huawei Ji <sup>1</sup>, Ze Xu <sup>1</sup>, Mingyu Wang <sup>1</sup>, Hong Zou <sup>1</sup>, Ying Chen <sup>2</sup> and Jun Ai <sup>2,\*</sup>

<sup>1</sup> School of Mechanical Engineering, Hangzhou Dianzi University, Hangzhou 310018, China

<sup>2</sup> Jiaxing Key Laboratory of Flexible Electronics based Intelligent Sensing and Advanced Manufacturing Technology, Institute of Flexible Electronics Technology of Tsinghua University, Jiaxing, 314000, China

\* Correspondence: aijun@ifet-tsinghua.org; Tel.: +86-13554327723

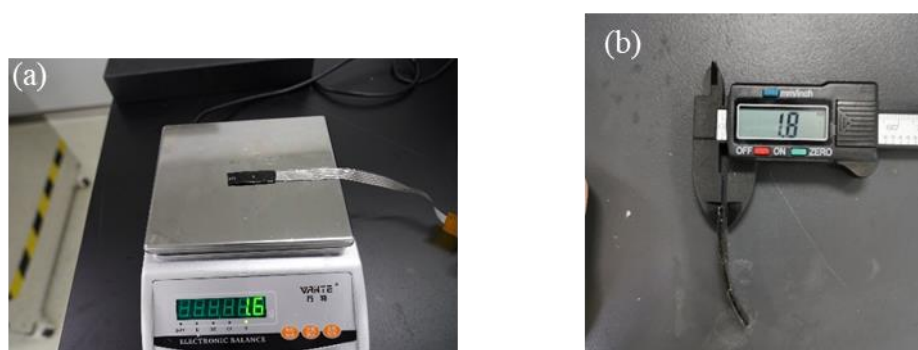

**Figure S1.** Weight and Size of the device. (a) The weight of the device is recorded. (b) A vernier caliper recorded the thickness of the device.

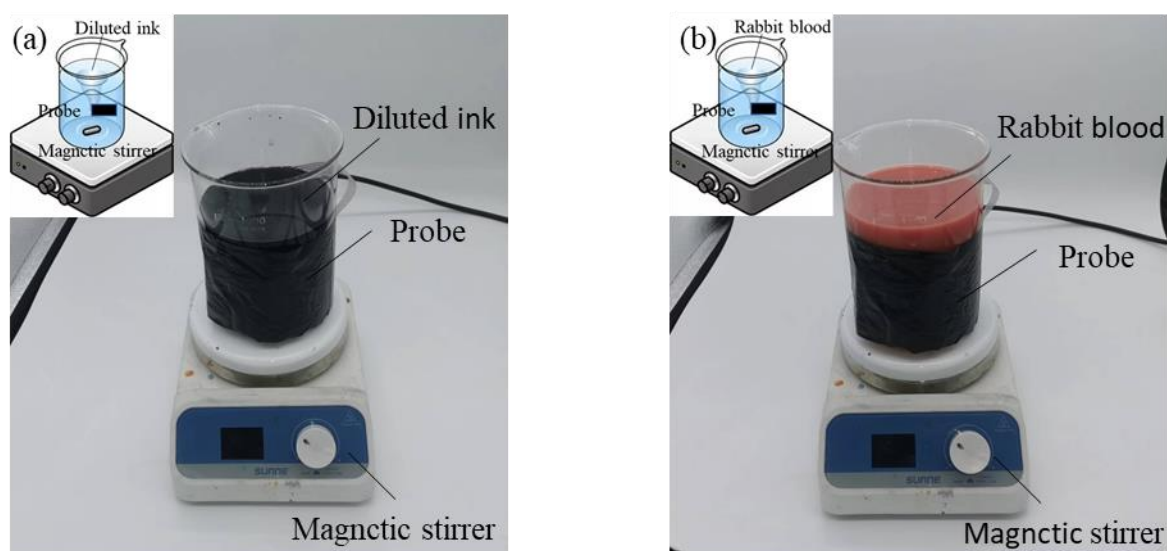

**Figure S2.** Set up *in vitro* experiment. (a) Set up of liquid optical model experiment. (b) Set up of blood model experiment.

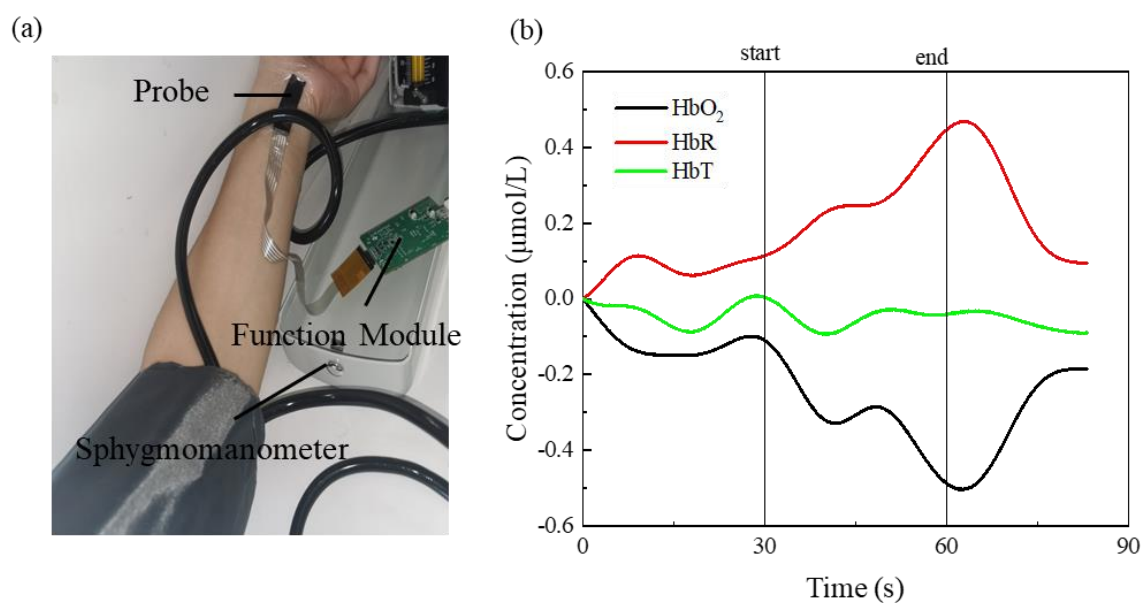

**Figure S3.** The image and results of the forearm blocking experiment. (a) Set up of the forearm blocking experiment. (b) The results of the experiment.

**Table S1.** Cost analysis of the device in this study.

| Components                | Cost Determination |
|---------------------------|--------------------|
| 750 nm LED & 850 nm LED   | \$0.5              |
| PD                        | \$7                |
| Flexible Polyimide Copper | \$0.5              |
| Fabrication Cost          | \$0.8              |
| PDMS & Black Dye          | \$1                |
